# Supplementary material
Source: PubMed Central journal article supplement (PMC5372701)
Supplement: NIHMS846588-supplement-SI.pdf [file NIHMS846588-supplement-SI.pdf]

# Theranostic Liposomes with Hypoxia-Activated Prodrug to Effectively Destruct Hypoxic Tumors post Photodynamic Therapy

Liangzhu Feng<sup>1,2</sup>, Liang Cheng<sup>1,3</sup>, Ziliang Dong<sup>1</sup>, Danlei Tao<sup>1</sup>, Weibo Cai<sup>3\*</sup>, Meiwang Chen<sup>2\*</sup>, Zhuang Liu<sup>1\*</sup>

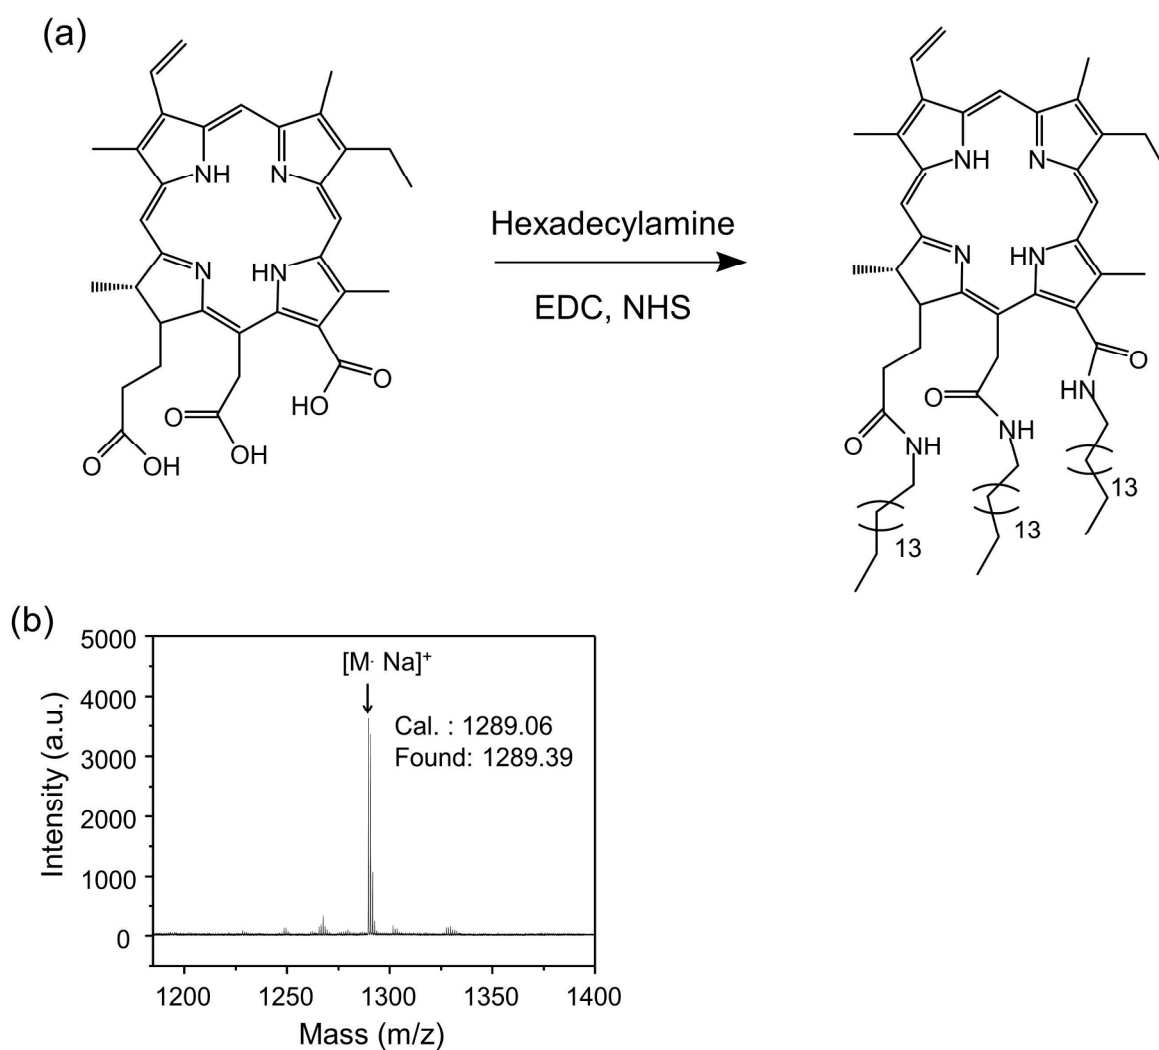

**Supporting Figure S1.** (a) A scheme showing the synthesis process of hexadecylamine conjugated Ce6 (*hCe6*). (b) MAIDI-TOF spectrum of as-prepared *hCe6*.

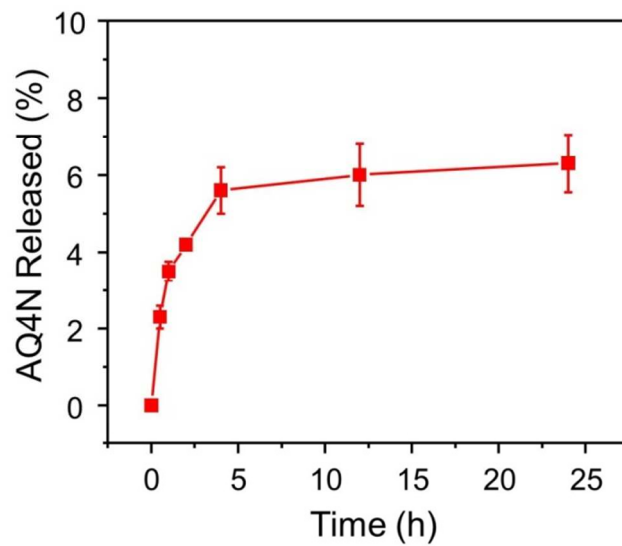

**Figure S2.** AQ4N release profile from AQ4N-hCe6-liposome in PBS (10 mM, pH7.4). AQ4N-hCe6-liposome (1 mL) in a dialysis tube with a molecular weight cut-off (MWCO) of 3.5 kDa was suspended in a glass vial containing 10 mL PBS (pH 7.4) at 37 °C. The released AQ4N was determined by its characteristic absorbance at 610 nm.

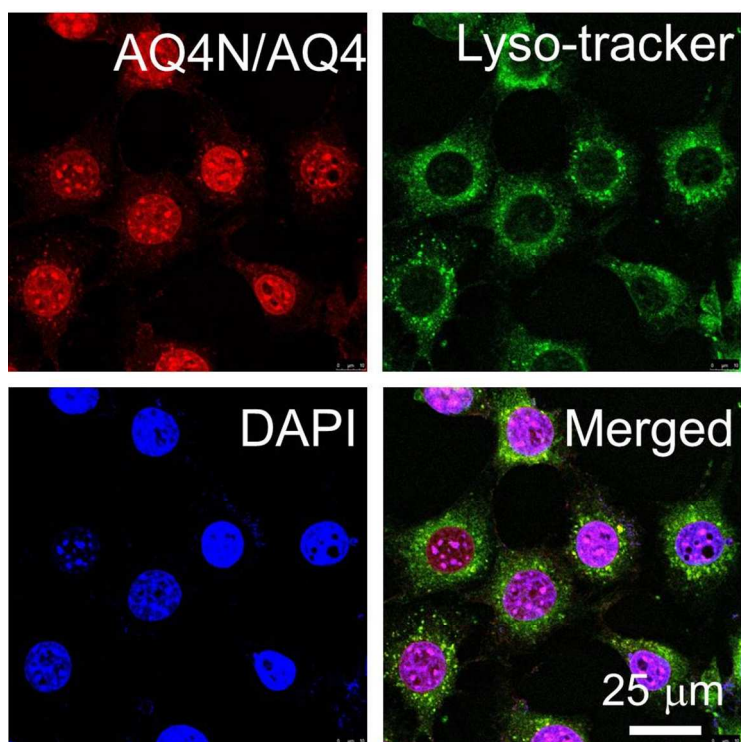

**Figure S3.** Intracellular distribution profile of AQ4N / AQ4 in 4T1 cells after being incubated with AQ4N-liposome under hypoxic condition for 12 h.

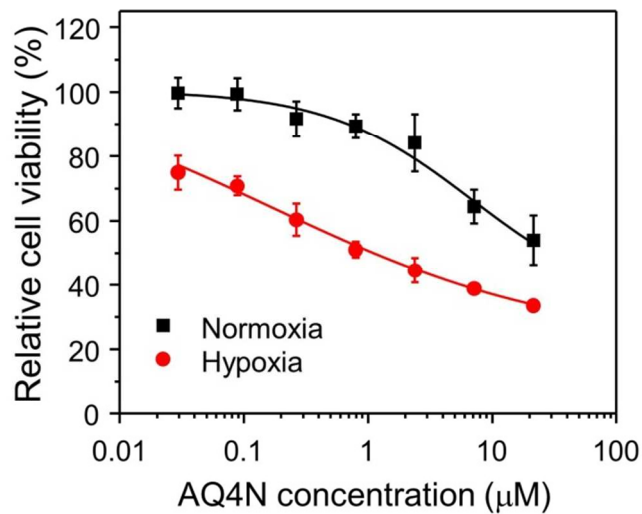

**Supporting Figure S4.** Relative cell viability of 4T1 cells treated with free AQ4N under normoxic or hypoxic conditions. Error bars were based triplicated measurements.

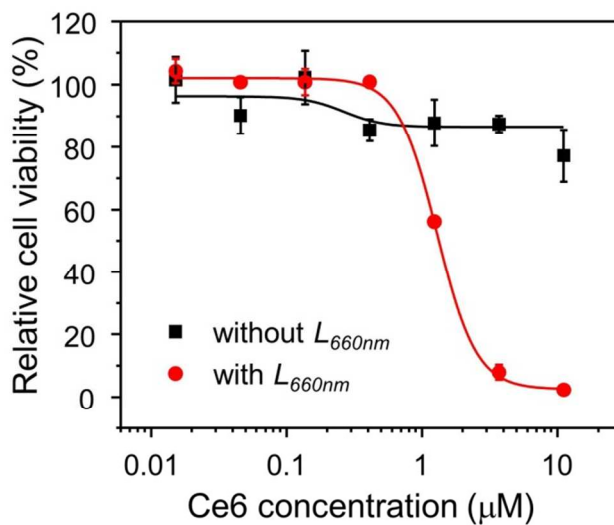

**Figure S5.** Cytotoxicity of *hCe6*-liposome to 4T1 cells in the presence or absence of 660-nm LED light irradiation recorded by the standard MTT assay. The error bars were based on triplicated measurements.

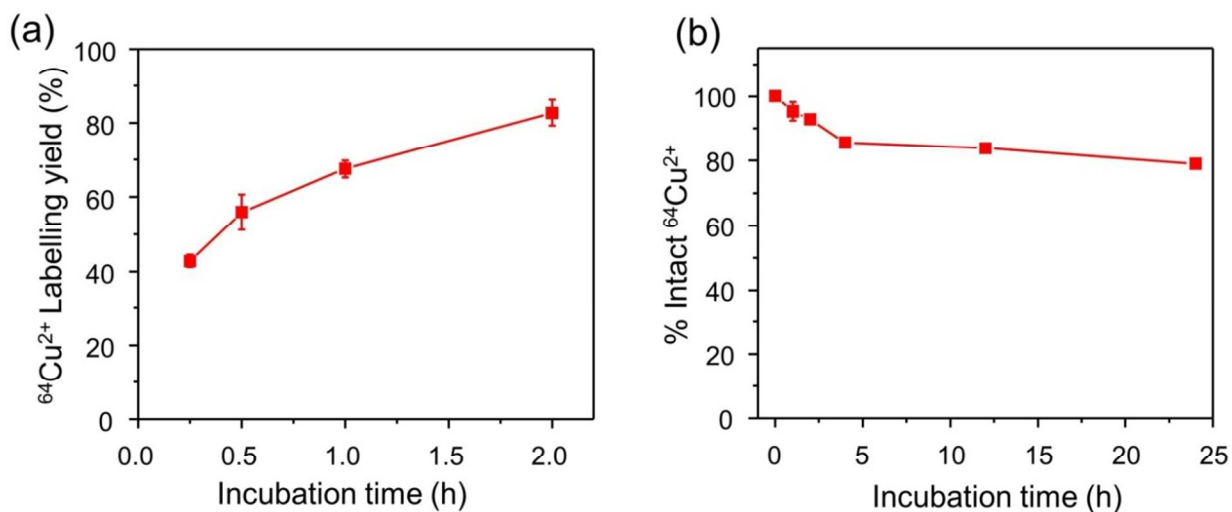

**Supporting Figure S6.** (a) Quantified labeling yields of  $^{64}\text{Cu}^{2+}$  on AQ4N-*h*Ce6-liposome after incubation for different periods of time. (b) Radiolabeling stability test of  $^{64}\text{Cu}$  labeling on AQ4N-*h*Ce6-liposome after incubation in mouse serum at 37 °C for different periods of time. Error bars were based on standard deviations (SD) of three samples at each time point.

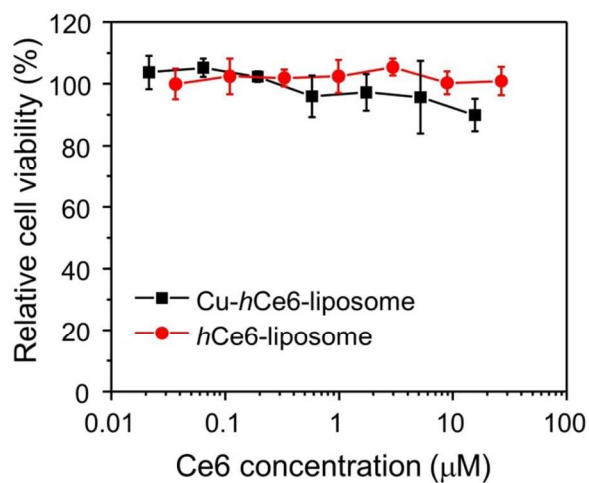

**Figure S7.** Cytotoxicity of Cu-*h*Ce6-liposome to 4T1 cells recorded by the standard MTT assay

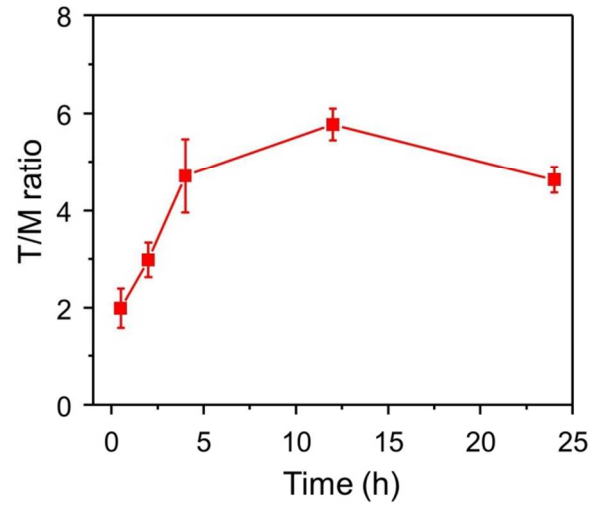

**Supporting Figure S8.** The tumor/muscle (T/M) ratios at various time points p.i. based on quantification analysis shown in Figure 4b.

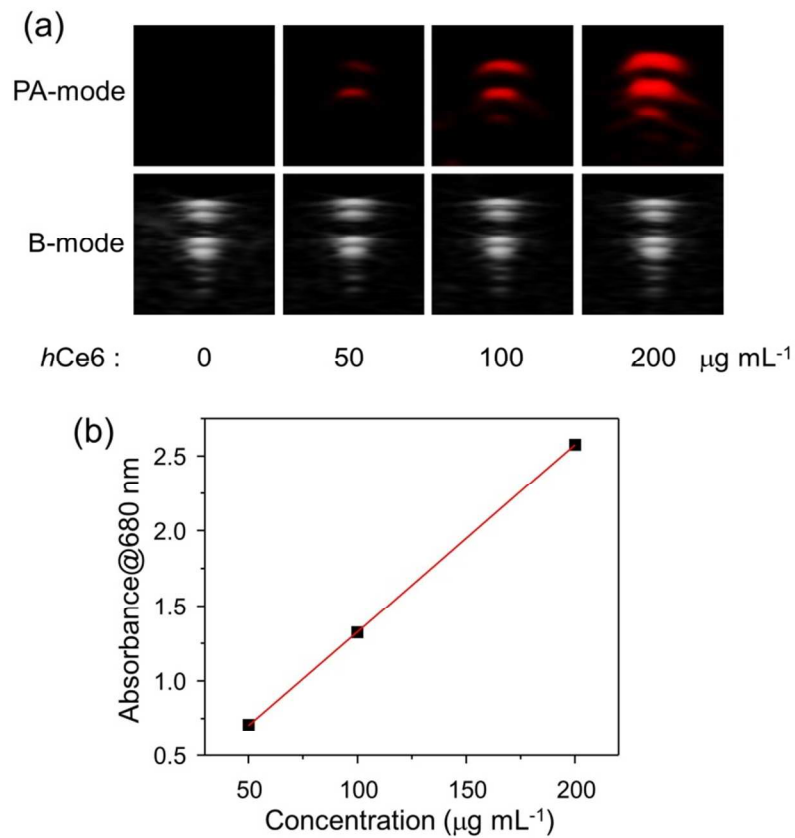

**Supporting Figure S9.** (a) PA imaging of AQ4N-*h*Ce6-liposome at indicated *h*Ce6 concentrations under the Visualsonic Vevo® 2100 LAZER system (680 nm, 21 MHz). (b) Linear correlation of the absorbance of AQ4N-*h*Ce6-liposome at 680 nm against its corresponding concentrations.
